# Supplementary material for: 3D clusters of somatic mutations in cancer reveal numerous rare mutations as functional targets
Source: PubMed Central journal article supplement (PMC5260099; doi:10.1186/s13073-016-0393-x), 2017-01-23

a Mapping mutations onto a protein structure

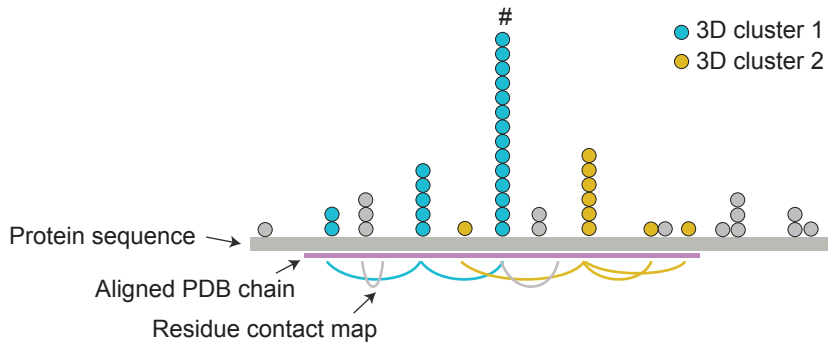

b An example decoy pattern for 3D cluster 1

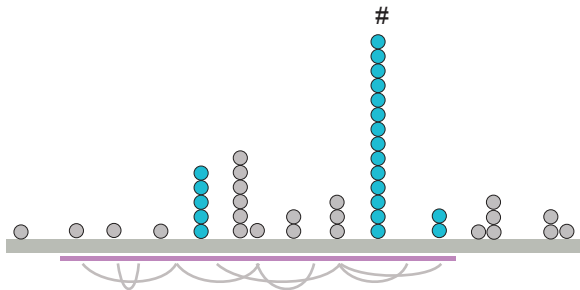

c An example decoy pattern for 3D cluster 2

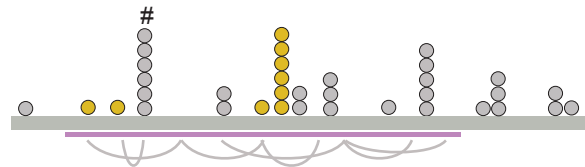

Supplement: 13073_2016_393_MOESM1_ESM.pdf [file 13073_2016_393_MOESM1_ESM.pdf]
