# Supplementary material for: 3D clusters of somatic mutations in cancer reveal numerous rare mutations as functional targets
Source: PubMed Central journal article supplement (PMC5260099; doi:10.1186/s13073-016-0393-x), 2017-01-23

3DHotspots.org  
Our method  
(3,404 residues)

Mutation3D  
Meyer et al. 2016  
(399 residues)

HotMAPS  
Tokheim et al. 2016  
(398 residues)

Hotspot3D  
Niu et al. 2016  
(14,929 residues)

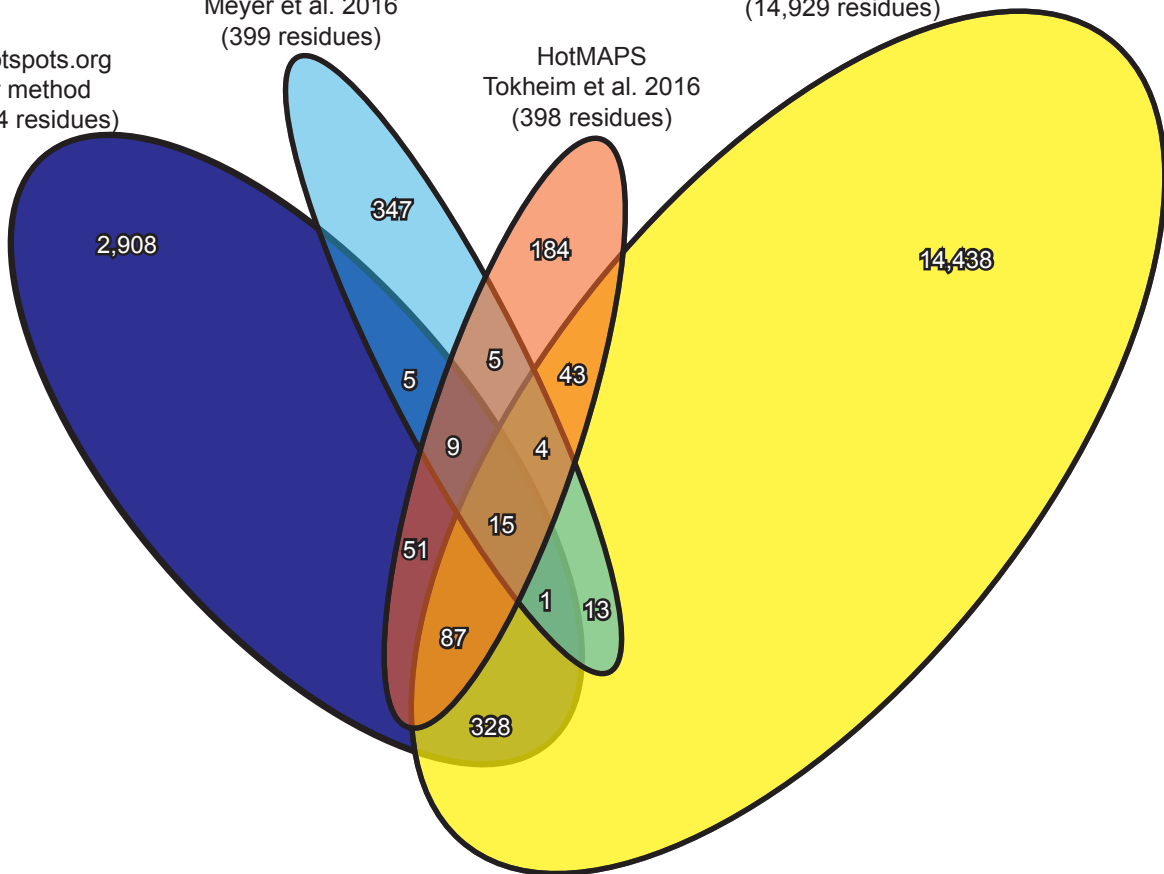

Supplement: 13073_2016_393_MOESM7_ESM.pdf [file 13073_2016_393_MOESM7_ESM.pdf]
